# Supplementary material for: Analysis of Homozygous-by-Descent (HBD) Segments for Purebred and Crossbred Pigs in Russia
Source: MDPI journal article supplement (doi:10.3390/life11080861), 2021-08-22
Supplement: s1 [file s1]

Supp. Table S1. QTLs in the longest HBD segments.

| <b>ID QTL</b> | <b>SSC</b> | <b>Trait</b>                     | <b>Class</b>  | <b>Group</b>        |
|---------------|------------|----------------------------------|---------------|---------------------|
| 22910         | 1          | Total number born                | Litter traits | Reproduction traits |
| 18485         | 1          | Total number born                | Litter traits | Reproduction traits |
| 18219         | 1          | Total number born                | Litter traits | Reproduction traits |
| 18218         | 1          | Total number born                | Litter traits | Reproduction traits |
| 18070         | 1          | Total number born alive          | Litter traits | Reproduction traits |
| 18115         | 1          | Number of stillborn              | Litter traits | Reproduction traits |
| 18291         | 1          | mummified pigs                   | Litter traits | Reproduction traits |
| 18290         | 1          | mummified pigs                   | Litter traits | Reproduction traits |
| 18272         | 1          | mummified pigs                   | Litter traits | Reproduction traits |
| 18270         | 1          | mummified pigs                   | Litter traits | Reproduction traits |
| 18239         | 1          | mummified pigs                   | Litter traits | Reproduction traits |
| 106223        | 1          | Litter size                      | Litter traits | Reproduction traits |
| 15972         | 1          | Lifetime number born alive       | Litter traits | Reproduction traits |
| 31822         | 1          | Corpus luteum number             | Litter traits | Reproduction traits |
| 22911         | 1          | Total number born                | Litter traits | Reproduction traits |
| 22921         | 1          | Total number born alive          | Litter traits | Reproduction traits |
| 22935         | 1          | Litter weight total              | Litter traits | Reproduction traits |
| 18271         | 1          | mummified pigs                   | Litter traits | Reproduction traits |
| 178884        | 1          | Number of mummified pigs         | Litter traits | Reproduction traits |
| 178883        | 1          | Number of mummified pigs         | Litter traits | Reproduction traits |
| 178885        | 1          | Number of mummified pigs         | Litter traits | Reproduction traits |
| 18128         | 1          | Number of stillborn              | Litter traits | Reproduction traits |
| 18490         | 1          | Litter weight piglets born alive | Litter traits | Reproduction traits |
| 18492         | 1          | Litter weight piglets born alive | Litter traits | Reproduction traits |
| 15973         | 1          | Lifetime total number born       | Litter traits | Reproduction traits |
| 15974         | 1          | Lifetime total number born       | Litter traits | Reproduction traits |
| 15975         | 1          | Lifetime number born alive       | Litter traits | Reproduction traits |

| ID QTL | SSC | Trait                                | Class               | Group               |
|--------|-----|--------------------------------------|---------------------|---------------------|
| 22922  | 1   | Total number born alive              | Litter traits       | Reproduction traits |
| 57514  | 1   | Litter birth interval                | Reproductive traits | Reproduction traits |
| 96089  | 1   | Age at puberty                       | Reproductive traits | Reproduction traits |
| 18167  | 1   | Gestation length                     | Reproductive traits | Reproduction traits |
| 126635 | 1   | Teat number                          | Reproductive organ  | Reproduction traits |
| 126623 | 1   | Teat number                          | Reproductive organ  | Reproduction traits |
| 126650 | 1   | Teat number difference between sides | Reproductive organ  | Reproduction traits |
| 126589 | 1   | Teat number difference between sides | Reproductive organ  | Reproduction traits |
| 126633 | 1   | Left teat number                     | Reproductive organ  | Reproduction traits |
| 211855 | 1   | Teat number                          | Reproductive organ  | Reproduction traits |
| 211788 | 1   | Teat number                          | Reproductive organ  | Reproduction traits |
| 211787 | 1   | Teat number                          | Reproductive organ  | Reproduction traits |
| 211786 | 1   | Teat number                          | Reproductive organ  | Reproduction traits |
| 126713 | 1   | Teat number                          | Reproductive organ  | Reproduction traits |
| 29553  | 1   | Feed conversion ratio                | Feed conversion     | Production traits   |
| 29552  | 1   | Feed conversion ratio                | Feed conversion     | Production traits   |
| 66267  | 1   | Daily feed intake                    | Feed intake         | Production traits   |
| 29543  | 1   | Daily feed intake                    | Feed intake         | Production traits   |
| 22198  | 1   | Daily feed intake                    | Feed intake         | Production traits   |
| 135641 | 1   | Daily feed intake                    | Feed intake         | Production traits   |
| 135639 | 1   | Daily feed intake                    | Feed intake         | Production traits   |
| 22427  | 1   | Average feeding rate                 | Feed intake         | Production traits   |
| 22386  | 1   | Daily feed intake                    | Feed intake         | Production traits   |
| 22385  | 1   | Daily feed intake                    | Feed intake         | Production traits   |
| 22389  | 1   | Daily feed intake                    | Feed intake         | Production traits   |
| 22388  | 1   | Daily feed intake                    | Feed intake         | Production traits   |
| 22387  | 1   | Daily feed intake                    | Feed intake         | Production traits   |
| 22384  | 1   | Daily feed intake                    | Feed intake         | Production traits   |
| 22370  | 1   | Daily feed intake                    | Feed intake         | Production traits   |

| ID QTL | SSC | Trait                  | Class       | Group             |
|--------|-----|------------------------|-------------|-------------------|
| 135650 | 1   | Time in feeder per day | Feed intake | Production traits |
| 29544  | 1   | Daily feed intake      | Feed intake | Production traits |
| 135640 | 1   | Daily feed intake      | Feed intake | Production traits |
| 135651 | 1   | Time in feeder per day | Feed intake | Production traits |
| 135649 | 1   | Time in feeder per day | Feed intake | Production traits |
| 22196  | 1   | Daily feed intake      | Feed intake | Production traits |
| 22205  | 1   | Daily feed intake      | Feed intake | Production traits |
| 135638 | 1   | Daily feed intake      | Feed intake | Production traits |
| 135648 | 1   | Time in feeder per day | Feed intake | Production traits |
| 22209  | 1   | Daily feed intake      | Feed intake | Production traits |
| 29545  | 1   | Daily feed intake      | Feed intake | Production traits |
| 22210  | 1   | Daily feed intake      | Feed intake | Production traits |
| 22211  | 1   | Daily feed intake      | Feed intake | Production traits |
| 139161 | 1   | Da+45:84ys to 110 kg   | Growth      | Production traits |
| 66275  | 1   | Body weight            | Growth      | Production traits |
| 65010  | 1   | Body weight            | Growth      | Production traits |
| 65008  | 1   | Body weight            | Growth      | Production traits |
| 22971  | 1   | Body weight birth      | Growth      | Production traits |
| 22970  | 1   | Body weight birth      | Growth      | Production traits |
| 172209 | 1   | Body height            | Growth      | Production traits |
| 22269  | 1   | Average daily gain     | Growth      | Production traits |
| 22232  | 1   | Average daily gain     | Growth      | Production traits |
| 22222  | 1   | Average daily gain     | Growth      | Production traits |
| 22268  | 1   | Average daily gain     | Growth      | Production traits |
| 22221  | 1   | Average daily gain     | Growth      | Production traits |
| 28800  | 1   | Average daily gain     | Growth      | Production traits |
| 28801  | 1   | Average daily gain     | Growth      | Production traits |
| 28802  | 1   | Average daily gain     | Growth      | Production traits |
| 28803  | 1   | Average daily gain     | Growth      | Production traits |

| ID QTL | SSC | Trait                          | Class  | Group             |
|--------|-----|--------------------------------|--------|-------------------|
| 28804  | 1   | Average daily gain             | Growth | Production traits |
| 28799  | 1   | Average daily gain             | Growth | Production traits |
| 28798  | 1   | Average daily gain             | Growth | Production traits |
| 28797  | 1   | Average daily gain             | Growth | Production traits |
| 28796  | 1   | Average daily gain             | Growth | Production traits |
| 22267  | 1   | Average daily gain             | Growth | Production traits |
| 22220  | 1   | Average daily gain             | Growth | Production traits |
| 22263  | 1   | Average daily gain             | Growth | Production traits |
| 22264  | 1   | Average daily gain             | Growth | Production traits |
| 22216  | 1   | Average daily gain             | Growth | Production traits |
| 22217  | 1   | Average daily gain             | Growth | Production traits |
| 28179  | 1   | Average daily gain on test     | Growth | Production traits |
| 22265  | 1   | Average daily gain             | Growth | Production traits |
| 22219  | 1   | Average daily gain             | Growth | Production traits |
| 22218  | 1   | Average daily gain             | Growth | Production traits |
| 22266  | 1   | Average daily gain             | Growth | Production traits |
| 28795  | 1   | Average daily gain             | Growth | Production traits |
| 28178  | 1   | Average daily gain entire life | Growth | Production traits |
| 22233  | 1   | Average daily gain             | Growth | Production traits |
| 29535  | 1   | Average daily gain on test     | Growth | Production traits |
| 29533  | 1   | Average daily gain on test     | Growth | Production traits |
| 211957 | 1   | Body weight birth              | Growth | Production traits |
| 22235  | 1   | Average daily gain             | Growth | Production traits |
| 22234  | 1   | Average daily gain             | Growth | Production traits |
| 65130  | 1   | Body weight                    | Growth | Production traits |
| 22261  | 1   | Average daily gain             | Growth | Production traits |
| 211924 | 1   | Days to 90 kg                  | Growth | Production traits |
| 22260  | 1   | Average daily gain             | Growth | Production traits |
| 211901 | 1   | Days to 90 kg                  | Growth | Production traits |

| ID QTL | SSC | Trait                      | Class   | Group                  |
|--------|-----|----------------------------|---------|------------------------|
| 22258  | 1   | Average daily gain         | Growth  | Production traits      |
| 22259  | 1   | Average daily gain         | Growth  | Production traits      |
| 139164 | 1   | Days to 110 kg             | Growth  | Production traits      |
| 139163 | 1   | Days to 110 kg             | Growth  | Production traits      |
| 22262  | 1   | Average daily gain         | Growth  | Production traits      |
| 66268  | 1   | Body weight                | Growth  | Production traits      |
| 29534  | 1   | Average daily gain on test | Growth  | Production traits      |
| 22226  | 1   | Average daily gain         | Growth  | Production traits      |
| 22227  | 1   | Average daily gain         | Growth  | Production traits      |
| 22228  | 1   | Average daily gain         | Growth  | Production traits      |
| 22229  | 1   | Average daily gain         | Growth  | Production traits      |
| 139162 | 1   | Days to 110 kg             | Growth  | Production traits      |
| 22224  | 1   | Average daily gain         | Growth  | Production traits      |
| 22225  | 1   | Average daily gain         | Growth  | Production traits      |
| 29579  | 1   | Loin muscle depth          | Anatomy | Meat and carcass trait |
| 22332  | 1   | Loin muscle area           | Anatomy | Meat and carcass trait |
| 22329  | 1   | Loin muscle area           | Anatomy | Meat and carcass trait |
| 65013  | 1   | Lean meat weight           | Anatomy | Meat and carcass trait |
| 95695  | 1   | Ham weight                 | Anatomy | Meat and carcass trait |
| 95694  | 1   | Ham weight                 | Anatomy | Meat and carcass trait |
| 95693  | 1   | Ham weight                 | Anatomy | Meat and carcass trait |
| 95692  | 1   | Ham weight                 | Anatomy | Meat and carcass trait |
| 28022  | 1   | Belly weight               | Anatomy | Meat and carcass trait |
| 22356  | 1   | Loin muscle area           | Anatomy | Meat and carcass trait |
| 22340  | 1   | Loin muscle area           | Anatomy | Meat and carcass trait |
| 22355  | 1   | Loin muscle area           | Anatomy | Meat and carcass trait |
| 22357  | 1   | Loin muscle area           | Anatomy | Meat and carcass trait |
| 22341  | 1   | Loin muscle area           | Anatomy | Meat and carcass trait |
| 22358  | 1   | Loin muscle area           | Anatomy | Meat and carcass trait |

| ID QTL | SSC | Trait                               | Class                  | Group                  |
|--------|-----|-------------------------------------|------------------------|------------------------|
| 22342  | 1   | Loin muscle area                    | Anatomy                | Meat and carcass trait |
| 22359  | 1   | Loin muscle area                    | Anatomy                | Meat and carcass trait |
| 22337  | 1   | Loin muscle area                    | Anatomy                | Meat and carcass trait |
| 22339  | 1   | Loin muscle area                    | Anatomy                | Meat and carcass trait |
| 22338  | 1   | Loin muscle area                    | Anatomy                | Meat and carcass trait |
| 22352  | 1   | Loin muscle area                    | Anatomy                | Meat and carcass trait |
| 22353  | 1   | Loin muscle area                    | Anatomy                | Meat and carcass trait |
| 22336  | 1   | Loin muscle area                    | Anatomy                | Meat and carcass trait |
| 22351  | 1   | Loin muscle area                    | Anatomy                | Meat and carcass trait |
| 22354  | 1   | Loin muscle area                    | Anatomy                | Meat and carcass trait |
| 211925 | 1   | Loin muscle area                    | Anatomy                | Meat and carcass trait |
| 17771  | 1   | Loin muscle area                    | Anatomy                | Meat and carcass trait |
| 22343  | 1   | Loin muscle area                    | Anatomy                | Meat and carcass trait |
| 22344  | 1   | Loin muscle area                    | Anatomy                | Meat and carcass trait |
| 22333  | 1   | Loin muscle area                    | Anatomy                | Meat and carcass trait |
| 22345  | 1   | Loin muscle area                    | Anatomy                | Meat and carcass trait |
| 22334  | 1   | Loin muscle area                    | Anatomy                | Meat and carcass trait |
| 22335  | 1   | Loin muscle area                    | Anatomy                | Meat and carcass trait |
| 193143 | 1   | Loin weight                         | Anatomy                | Meat and carcass trait |
| 193144 | 1   | Ham weight                          | Anatomy                | Meat and carcass trait |
| 18654  | 1   | androstenone laboratory             | Chemistry              | Meat and carcass trait |
| 161322 | 1   | Conductivity 45 minutes post-mortem | Conductivity impedance | Meat and carcass trait |
| 17772  | 1   | Conductivity 45 minutes post-mortem | Conductivity impedance | Meat and carcass trait |
| 65015  | 1   | Lean meat percentage                | Fatness                | Meat and carcass trait |
| 139172 | 1   | Lean meat percentage                | Fatness                | Meat and carcass trait |
| 29591  | 1   | Intramuscular fat content           | Fatness                | Meat and carcass trait |
| 193140 | 1   | Intramuscular fat content           | Fatness                | Meat and carcass trait |
| 125483 | 1   | Intramuscular fat content           | Fatness                | Meat and carcass trait |
| 65012  | 1   | Fat weight total                    | Fatness                | Meat and carcass trait |

| ID QTL | SSC | Trait                                 | Class              | Group                  |
|--------|-----|---------------------------------------|--------------------|------------------------|
| 65009  | 1   | Fat weight total                      | Fatness            | Meat and carcass trait |
| 65007  | 1   | Fat_weight_total                      | Fatness            | Meat and carcass trait |
| 65014  | 1   | Fat_percentage_in_carcass             | Fatness            | Meat and carcass trait |
| 65011  | 1   | Fat_percentage_in_carcass             | Fatness            | Meat and carcass trait |
| 121914 | 1   | Backfat between 3rd and 4th last ribs | Fatness            | Meat and carcass trait |
| 121909 | 1   | Backfat between 3rd and 4th last ribs | Fatness            | Meat and carcass trait |
| 29564  | 1   | Average backfat thickness             | Fatness            | Meat and carcass trait |
| 29531  | 1   | Average backfat thickness             | Fatness            | Meat and carcass trait |
| 211916 | 1   | Average backfat thickness             | Fatness            | Meat and carcass trait |
| 193553 | 1   | Intramuscular fat content             | Fatness            | Meat and carcass trait |
| 193554 | 1   | Intramuscular fat content             | Fatness            | Meat and carcass trait |
| 28180  | 1   | Fat area                              | Fatness            | Meat and carcass trait |
| 28181  | 1   | Backfat at last rib                   | Fatness            | Meat and carcass trait |
| 139173 | 1   | Lean_meat_percentage                  | Fatness            | Meat and carcass trait |
| 211930 | 1   | Lean meat percentage                  | Fatness            | Meat and carcass trait |
| 17773  | 1   | Average backfat thickness             | Fatness            | Meat and carcass trait |
| 65016  | 1   | Fat_percentage_in_carcass             | Fatness            | Meat and carcass trait |
| 65018  | 1   | Fat weight total                      | Fatness            | Meat and carcass trait |
| 29565  | 1   | Average backfat thickness             | Fatness            | Meat and carcass trait |
| 32099  | 1   | Palmitic acid content                 | Fatty acid content | Meat and carcass trait |
| 32098  | 1   | Palmitic acid content                 | Fatty acid content | Meat and carcass trait |
| 32063  | 1   | Palmitic acid content                 | Fatty acid content | Meat and carcass trait |
| 32062  | 1   | Palmitic acid content                 | Fatty acid content | Meat and carcass trait |
| 106264 | 1   | Monounsaturated fatty acid content    | Fatty acid content | Meat and carcass trait |
| 32103  | 1   | Linoleic acid content                 | Fatty acid content | Meat and carcass trait |
| 32102  | 1   | Linoleic acid content                 | Fatty acid content | Meat and carcass trait |
| 32101  | 1   | Linoleic acid content                 | Fatty acid content | Meat and carcass trait |
| 32100  | 1   | Linoleic acid content                 | Fatty acid content | Meat and carcass trait |
| 32065  | 1   | Eicosatrienoic acid content           | Fatty acid content | Meat and carcass trait |

| ID QTL | SSC | Trait                                   | Class                  | Group                  |
|--------|-----|-----------------------------------------|------------------------|------------------------|
| 22470  | 1   | Stearic acid content                    | Fatty acid content     | Meat and carcass trait |
| 22469  | 1   | cis-11-Eicosenoic acid content          | Fatty acid content     | Meat and carcass trait |
| 193486 | 1   | Stearic acid content                    | Fatty acid content     | Meat and carcass trait |
| 193482 | 1   | Palmitoleic acid to palmitic acid ratio | Fatty acid content     | Meat and carcass trait |
| 193481 | 1   | Palmitoleic acid to palmitic acid ratio | Fatty acid content     | Meat and carcass trait |
| 193480 | 1   | Palmitoleic acid to palmitic acid ratio | Fatty acid content     | Meat and carcass trait |
| 193479 | 1   | Palmitoleic acid to palmitic acid ratio | Fatty acid content     | Meat and carcass trait |
| 193475 | 1   | Palmitoleic acid to palmitic acid ratio | Fatty acid content     | Meat and carcass trait |
| 193483 | 1   | Stearic acid content                    | Fatty acid content     | Meat and carcass trait |
| 193478 | 1   | Palmitoleic acid to palmitic acid ratio | Fatty acid content     | Meat and carcass trait |
| 121898 | 1   | Meat color b*                           | Meat color             | Meat and carcass trait |
| 95258  | 1   | Meat color a*                           | Meat color             | Meat and carcass trait |
| 193141 | 1   | Meat color L*                           | Meat color             | Meat and carcass trait |
| 193142 | 1   | Meat color b*                           | Meat color             | Meat and carcass trait |
| 28046  | 1   | pH 24 hr post mortem ham                | pH                     | Meat and carcass trait |
| 17770  | 1   | pH 24 hr post mortem ham                | pH                     | Meat and carcass trait |
| 28105  | 1   | pH 24 hr post mortem ham                | pH                     | Meat and carcass trait |
| 22433  | 1   | Shear force                             | Texture                | Meat and carcass trait |
| 28107  | 1   | Water holding capacity                  | Texture                | Meat and carcass trait |
| 107292 | 1   | Mean platelet volume                    | Blood parameters       | Health Traits          |
| 107291 | 1   | Mean platelet volume                    | Blood parameters       | Health Traits          |
| 107311 | 1   | Platelet count                          | Blood parameters       | Health Traits          |
| 107303 | 1   | Plateletcrit                            | Blood parameters       | Health Traits          |
| 21348  | 1   | PRRSV susceptibility                    | Disease susceptibility | Health Traits          |
| 140357 | 1   | PRRSV susceptibility                    | Disease susceptibility | Health Traits          |
| 30985  | 1   | Maternal infanticide                    | Behavioral             | Exterior traits        |
| 30984  | 1   | Maternal infanticide                    | Behavioral             | Exterior traits        |
| 30983  | 1   | Maternal infanticide                    | Behavioral             | Exterior traits        |
| 30982  | 1   | Maternal infanticide                    | Behavioral             | Exterior traits        |



| ID QTL | SSC | Trait                    | Class         | Group               |
|--------|-----|--------------------------|---------------|---------------------|
| 30986  | 1   | Maternal infanticide     | Behavioral    | Exterior traits     |
| 126114 | 1   | Top_line_conformation    | Conformation  | Exterior traits     |
| 126113 | 1   | Top_line_conformation    | Conformation  | Exterior traits     |
| 64697  | 1   | Lumbar vertebra number   | Conformation  | Exterior traits     |
| 64698  | 1   | Lumbar vertebra number   | Conformation  | Exterior traits     |
| 64627  | 1   | Thoracic vertebra number | Conformation  | Exterior traits     |
| 126125 | 1   | Conformation score       | Conformation  | Exterior traits     |
| 55895  | 1   | Scrotal/inguinal hernia  | Defects       | Exterior traits     |
| 22916  | 13  | Total_number_born        | Litter traits | Reproduction traits |
| 18231  | 13  | Total_number_born        | Litter traits | Reproduction traits |
| 18207  | 13  | Total_number_born        | Litter traits | Reproduction traits |
| 18202  | 13  | Total_number_born        | Litter traits | Reproduction traits |
| 18201  | 13  | Total_number_born        | Litter traits | Reproduction traits |
| 18200  | 13  | Total_number_born        | Litter traits | Reproduction traits |
| 18199  | 13  | Total_number_born        | Litter traits | Reproduction traits |
| 18084  | 13  | Total_number_born_alive  | Litter traits | Reproduction traits |
| 18082  | 13  | Total_number_born_alive  | Litter traits | Reproduction traits |
| 18080  | 13  | Total_number_born_alive  | Litter traits | Reproduction traits |
| 18079  | 13  | Total_number_born_alive  | Litter traits | Reproduction traits |
| 18078  | 13  | Total_number_born_alive  | Litter traits | Reproduction traits |
| 18077  | 13  | Total_number_born_alive  | Litter traits | Reproduction traits |
| 18076  | 13  | Total_number_born_alive  | Litter traits | Reproduction traits |
| 170930 | 13  | Total_number_born_alive  | Litter traits | Reproduction traits |
| 170929 | 13  | Total_number_born_alive  | Litter traits | Reproduction traits |
| 57525  | 13  | Number_of_stillborn      | Litter traits | Reproduction traits |
| 57521  | 13  | Number_of_stillborn      | Litter traits | Reproduction traits |
| 18134  | 13  | Number_of_stillborn      | Litter traits | Reproduction traits |
| 18133  | 13  | Number_of_stillborn      | Litter traits | Reproduction traits |
| 18314  | 13  | mummified pigs           | Litter traits | Reproduction traits |

| ID QTL | SSC | Trait                                | Class               | Group               |
|--------|-----|--------------------------------------|---------------------|---------------------|
| 18313  | 13  | mummified pigs                       | Litter traits       | Reproduction traits |
| 18312  | 13  | mummified pigs                       | Litter traits       | Reproduction traits |
| 18283  | 13  | mummified pigs                       | Litter traits       | Reproduction traits |
| 18262  | 13  | mummified pigs                       | Litter traits       | Reproduction traits |
| 18261  | 13  | mummified pigs                       | Litter traits       | Reproduction traits |
| 18260  | 13  | mummified pigs                       | Litter traits       | Reproduction traits |
| 18259  | 13  | mummified pigs                       | Litter traits       | Reproduction traits |
| 18258  | 13  | mummified pigs                       | Litter traits       | Reproduction traits |
| 106219 | 13  | Litter size                          | Litter traits       | Reproduction traits |
| 106227 | 13  | Litter size at day 5 after birth     | Litter traits       | Reproduction traits |
| 31888  | 13  | Corpus luteum number                 | Litter traits       | Reproduction traits |
| 31885  | 13  | Corpus luteum number                 | Litter traits       | Reproduction traits |
| 31884  | 13  | Corpus luteum number                 | Litter traits       | Reproduction traits |
| 22927  | 13  | Total number born alive              | Litter traits       | Reproduction traits |
| 18081  | 13  | Total number born alive              | Litter traits       | Reproduction traits |
| 18205  | 13  | Total number born                    | Litter traits       | Reproduction traits |
| 18204  | 13  | Total number born                    | Litter traits       | Reproduction traits |
| 18198  | 13  | Total number born                    | Litter traits       | Reproduction traits |
| 57529  | 13  | Number of stillborn                  | Litter traits       | Reproduction traits |
| 18085  | 13  | Total number born alive              | Litter traits       | Reproduction traits |
| 18208  | 13  | Total number born                    | Litter traits       | Reproduction traits |
| 18203  | 13  | Total number born                    | Litter traits       | Reproduction traits |
| 31887  | 13  | Corpus luteum number                 | Litter traits       | Reproduction traits |
| 18177  | 13  | Gestation length                     | Reproductive traits | Reproduction traits |
| 126680 | 13  | Teat number                          | Reproductive organ  | Reproduction traits |
| 126650 | 13  | Teat number difference between sides | Reproductive organ  | Reproduction traits |
| 126716 | 13  | Left teat number                     | Reproductive organ  | Reproduction traits |
| 55859  | 13  | Cryptorchidism                       | Reproductive organ  | Reproduction traits |
| 126606 | 13  | Teat number difference between sides | Reproductive organ  | Reproduction traits |

| <b>ID QTL</b> | <b>SSC</b> | <b>Trait</b>              | <b>Class</b>       | <b>Group</b>           |
|---------------|------------|---------------------------|--------------------|------------------------|
| 135656        | 13         | Time in feeder per day    | Feed intake        | Production traits      |
| 65130         | 13         | Body_weight               | Growth             | Production traits      |
| 29602         | 13         | Body_weight_birth         | Growth             | Production traits      |
| 23004         | 13         | Body_weight_birth         | Growth             | Production traits      |
| 23003         | 13         | Body_weight_birth         | Growth             | Production traits      |
| 28068         | 13         | Residual_feed_intake      | Feed intake        | Production traits      |
| 28078         | 13         | Residual_feed_intake      | Feed intake        | Production traits      |
| 28079         | 13         | Residual_feed_intake      | Feed intake        | Production traits      |
| 21965         | 13         | Firmness                  | Texture            | Meat and carcass trait |
| 55965         | 13         | Drip_loss                 | Texture            | Meat and carcass trait |
| 32091         | 13         | Palmitic_acid_content     | Fatty acid content | Meat and carcass trait |
| 32090         | 13         | Palmitic_acid_content     | Fatty acid content | Meat and carcass trait |
| 106287        | 13         | Oleic_acid_content        | Fatty acid content | Meat and carcass trait |
| 32127         | 13         | Linoleic_acid_content     | Fatty acid content | Meat and carcass trait |
| 32126         | 13         | Palmitic_acid_content     | Fatty acid content | Meat and carcass trait |
| 22458         | 13         | Intramuscular_fat_content | Fatness            | Meat and carcass trait |
| 125483        | 13         | Intramuscular_fat_content | Fatness            | Meat and carcass trait |
| 135764        | 13         | Backfat_at_rump           | Fatness            | Meat and carcass trait |
| 22291         | 13         | Average_backfat_thickness | Fatness            | Meat and carcass trait |
| 193573        | 13         | Average_backfat_thickness | Fatness            | Meat and carcass trait |
| 121782        | 13         | Average_backfat_thickness | Fatness            | Meat and carcass trait |
| 121773        | 13         | Average_backfat_thickness | Fatness            | Meat and carcass trait |
| 121772        | 13         | Average_backfat_thickness | Fatness            | Meat and carcass trait |
| 121770        | 13         | Average_backfat_thickness | Fatness            | Meat and carcass trait |
| 121769        | 13         | Average_backfat_thickness | Fatness            | Meat and carcass trait |
| 24223         | 13         | Intramuscular_fat_content | Fatness            | Meat and carcass trait |
| 135760        | 13         | Intestinal_fat_weight     | Fatness            | Meat and carcass trait |
| 135762        | 13         | Backfat_at_rump           | Fatness            | Meat and carcass trait |
| 135765        | 13         | Backfat_at_last_rib       | Fatness            | Meat and carcass trait |

| ID QTL | SSC | Trait                               | Class                  | Group                  |
|--------|-----|-------------------------------------|------------------------|------------------------|
| 18662  | 13  | indole laboratory                   | Chimistry              | Meat and carcass trait |
| 23173  | 13  | Shoulder_weight                     | Anatomy                | Meat and carcass trait |
| 24222  | 13  | Loin_percentage                     | Anatomy                | Meat and carcass trait |
| 29588  | 13  | Loin_muscle_depth                   | Anatomy                | Meat and carcass trait |
| 29587  | 13  | Loin_muscle_depth                   | Anatomy                | Meat and carcass trait |
| 29586  | 13  | Loin_muscle_depth                   | Anatomy                | Meat and carcass trait |
| 95713  | 13  | Ham_weight                          | Anatomy                | Meat and carcass trait |
| 29589  | 13  | Loin_muscle_depth                   | Anatomy                | Meat and carcass trait |
| 140335 | 13  | PRRSV_susceptibility                | Disease susceptibility | Health Traits          |
| 107286 | 13  | Mean_corpuscular_volume             | Blood parameters       | Health Traits          |
| 107263 | 13  | Mean_corpuscular_hemoglobin_content | Blood parameters       | Health Traits          |
| 56002  | 13  | LDL_cholesterol                     | Blood parameters       | Health Traits          |
| 55992  | 13  | LDL_cholesterol                     | Blood parameters       | Health Traits          |
| 107328 | 13  | Red_cell_distribution_width         | Blood parameters       | Health Traits          |
| 107287 | 13  | Mean_corpuscular_volume             | Blood parameters       | Health Traits          |
| 107253 | 13  | Lymphocyte_number                   | Imune capacity         | Health Traits          |
| 64768  | 13  | Spinal_curvature                    | Defects                | Exterior traits        |
| 64687  | 13  | Spinal_curvature                    | Defects                | Exterior traits        |
| 55898  | 13  | Scrotal/inguinal_hernia             | Defects                | Exterior traits        |
| 31001  | 13  | Maternal_infanticide                | Behavioral             | Exterior traits        |
| 126149 | 13  | Conformation_score                  | Conformation           | Exterior traits        |
| 31003  | 13  | Maternal_infanticide                | Behavioral             | Exterior traits        |
| 18235  | 15  | Total_number_born                   | Litter traits          | Reproduction traits    |
| 18212  | 15  | Total_number_born                   | Litter traits          | Reproduction traits    |
| 22928  | 15  | Total_number_born_alive             | Litter traits          | Reproduction traits    |
| 18093  | 15  | Total_number_born_alive             | Litter traits          | Reproduction traits    |
| 18092  | 15  | Total_number_born_alive             | Litter traits          | Reproduction traits    |
| 170932 | 15  | Total_number_born_alive             | Litter traits          | Reproduction traits    |
| 57533  | 15  | Number_of_stillborn                 | Litter traits          | Reproduction traits    |

| ID QTL | SSC | Trait                                | Class               | Group               |
|--------|-----|--------------------------------------|---------------------|---------------------|
| 57532  | 15  | Number of stillborn                  | Litter traits       | Reproduction traits |
| 57530  | 15  | Number of stillborn                  | Litter traits       | Reproduction traits |
| 57522  | 15  | Number of stillborn                  | Litter traits       | Reproduction traits |
| 57519  | 15  | Number of stillborn                  | Litter traits       | Reproduction traits |
| 18135  | 15  | Number of stillborn                  | Litter traits       | Reproduction traits |
| 18128  | 15  | Number of stillborn                  | Litter traits       | Reproduction traits |
| 18317  | 15  | mummified pigs                       | Litter traits       | Reproduction traits |
| 18266  | 15  | mummified pigs                       | Litter traits       | Reproduction traits |
| 18264  | 15  | mummified pigs                       | Litter traits       | Reproduction traits |
| 22961  | 15  | Litter weight total                  | Litter traits       | Reproduction traits |
| 22960  | 15  | Litter weight total                  | Litter traits       | Reproduction traits |
| 31894  | 15  | Corpus luteum number                 | Litter traits       | Reproduction traits |
| 31891  | 15  | Corpus luteum number                 | Litter traits       | Reproduction traits |
| 170933 | 15  | Total number born alive              | Litter traits       | Reproduction traits |
| 18111  | 15  | Number of stillborn                  | Litter traits       | Reproduction traits |
| 31895  | 15  | Corpus luteum number                 | Litter traits       | Reproduction traits |
| 57518  | 15  | Number of stillborn                  | Litter traits       | Reproduction traits |
| 57531  | 15  | Number of stillborn                  | Litter traits       | Reproduction traits |
| 18233  | 15  | Total number born                    | Litter traits       | Reproduction traits |
| 22918  | 15  | Total number born                    | Litter traits       | Reproduction traits |
| 22959  | 15  | Litter weight total                  | Litter traits       | Reproduction traits |
| 18152  | 15  | Gestation length                     | Reproductive traits | Reproduction traits |
| 96083  | 15  | Age at puberty                       | Reproductive traits | Reproduction traits |
| 160686 | 15  | Sperm abnormality rate               | Reproduction traits | Reproduction traits |
| 37467  | 15  | Teat number                          | Reproductive organ  | Reproduction traits |
| 126593 | 15  | Teat number difference between sides | Reproductive organ  | Reproduction traits |
| 126698 | 15  | Left teat number                     | Reproductive organ  | Reproduction traits |
| 126685 | 15  | Left teat number                     | Reproductive organ  | Reproduction traits |
| 126684 | 15  | Teat number difference between sides | Reproductive organ  | Reproduction traits |

| <b>ID QTL</b> | <b>SSC</b> | <b>Trait</b>                          | <b>Class</b>       | <b>Group</b>           |
|---------------|------------|---------------------------------------|--------------------|------------------------|
| 23016         | 15         | Body weight birth                     | Growth             | Production traits      |
| 23015         | 15         | Body weight birth                     | Growth             | Production traits      |
| 23014         | 15         | Body weight birth                     | Growth             | Production traits      |
| 23013         | 15         | Body weight birth                     | Growth             | Production traits      |
| 170898        | 15         | Days to 100 kg                        | Growth             | Production traits      |
| 139170        | 15         | Days to 110 kg                        | Growth             | Production traits      |
| 167229        | 15         | Cooking yield                         | Texture            | Meat and carcass trait |
| 167230        | 15         | Drip loss                             | Texture            | Meat and carcass trait |
| 167228        | 15         | pH 24 hr post-mortem loin             | pH                 | Meat and carcass trait |
| 32130         | 15         | P+44:93almitic acid content           | Fatty acid content | Meat and carcass trait |
| 32094         | 15         | Myristic acid content                 | Fatty acid content | Meat and carcass trait |
| 32131         | 15         | Palmitic acid content                 | Fatty acid content | Meat and carcass trait |
| 65140         | 15         | Lean meat percentage                  | Fatness            | Meat and carcass trait |
| 29599         | 15         | Intramuscular fat content             | Fatness            | Meat and carcass trait |
| 147273        | 15         | Intramuscular fat content             | Fatness            | Meat and carcass trait |
| 125487        | 15         | Intramuscular fat content             | Fatness            | Meat and carcass trait |
| 65145         | 15         | Fat weight total                      | Fatness            | Meat and carcass trait |
| 65142         | 15         | Fat percentage in carcass             | Fatness            | Meat and carcass trait |
| 65138         | 15         | Fat percentage in carcass             | Fatness            | Meat and carcass trait |
| 121913        | 15         | Backfat between 3rd and 4th last ribs | Fatness            | Meat and carcass trait |
| 121911        | 15         | Backfat between 3rd and 4th last ribs | Fatness            | Meat and carcass trait |
| 135764        | 15         | Backfat at rump                       | Fatness            | Meat and carcass trait |
| 170629        | 15         | Average backfat thickness             | Fatness            | Meat and carcass trait |
| 65144         | 15         | Fat weight total                      | Fatness            | Meat and carcass trait |
| 65141         | 15         | Lean meat percentage                  | Fatness            | Meat and carcass trait |
| 121777        | 15         | Average backfat thickness             | Fatness            | Meat and carcass trait |
| 65143         | 15         | Lean meat percentage                  | Fatness            | Meat and carcass trait |
| 65147         | 15         | Fat percentage in carcass             | Fatness            | Meat and carcass trait |
| 65146         | 15         | Lean meat percentage                  | Fatness            | Meat and carcass trait |

| ID QTL | SSC | Trait                               | Class     | Group                  |
|--------|-----|-------------------------------------|-----------|------------------------|
| 170646 | 15  | Lean meat percentage                | Fatness   | Meat and carcass trait |
| 147274 | 15  | Intramuscular_fat_content           | Fatness   | Meat and carcass trait |
| 65139  | 15  | Fat_weight_total                    | Fatness   | Meat and carcass trait |
| 135765 | 15  | Backfat at last rib                 | Fatness   | Meat and carcass trait |
| 147278 | 15  | Intramuscular_fat_content           | Fatness   | Meat and carcass trait |
| 147283 | 15  | Intramuscular_fat_content           | Fatness   | Meat and carcass trait |
| 147284 | 15  | Intramuscular_fat_content           | Fatness   | Meat and carcass trait |
| 147285 | 15  | Intramuscular_fat_content           | Fatness   | Meat and carcass trait |
| 147286 | 15  | Intramuscular_fat_content           | Fatness   | Meat and carcass trait |
| 147287 | 15  | Intramuscular_fat_content           | Fatness   | Meat and carcass trait |
| 147288 | 15  | Intramuscular_fat_content           | Fatness   | Meat and carcass trait |
| 147289 | 15  | Intramuscular_fat_content           | Fatness   | Meat and carcass trait |
| 147290 | 15  | Intramuscular_fat_content           | Fatness   | Meat and carcass trait |
| 147291 | 15  | Intramuscular_fat_content           | Fatness   | Meat and carcass trait |
| 147292 | 15  | Intramuscular_fat_content           | Fatness   | Meat and carcass trait |
| 147293 | 15  | Intramuscular_fat_content           | Fatness   | Meat and carcass trait |
| 147282 | 15  | Intramuscular_fat_content           | Fatness   | Meat and carcass trait |
| 147281 | 15  | Intramuscular_fat_content           | Fatness   | Meat and carcass trait |
| 147280 | 15  | Intramuscular_fat_content           | Fatness   | Meat and carcass trait |
| 147279 | 15  | Intramuscular_fat_content           | Fatness   | Meat and carcass trait |
| 135761 | 15  | Backfat at first rib                | Fatness   | Meat and carcass trait |
| 135763 | 15  | Backfat at first rib                | Fatness   | Meat and carcass trait |
| 135760 | 15  | Intestinal fat weight               | Fatness   | Meat and carcass trait |
| 135762 | 15  | Backfat at rump                     | Fatness   | Meat and carcass trait |
| 135759 | 15  | Shoulder_subcutaneous_fat_thickness | Fatness   | Meat and carcass trait |
| 147275 | 15  | Intramuscular_fat_content           | Fatness   | Meat and carcass trait |
| 147277 | 15  | Intramuscular_fat_content           | Fatness   | Meat and carcass trait |
| 147276 | 15  | Intramuscular_fat_content           | Fatness   | Meat and carcass trait |
| 167231 | 15  | muscle protein percentage           | Chimistry | Meat and carcass trait |

| <b>ID QTL</b> | <b>SSC</b> | <b>Trait</b>                  | <b>Class</b>           | <b>Group</b>           |
|---------------|------------|-------------------------------|------------------------|------------------------|
| 18662         | 15         | indole laboratory             | Chimestry              | Meat and carcass trait |
| 107331        | 15         | Red_cell_distribution_width   | Blood parameters       | Health Traits          |
| 140329        | 15         | PRRS_viral_load               | Disease susceptibility | Health Traits          |
| 15128         | 15         | Bilirubin level               | Blood parameters       | Health Traits          |
| 171144        | 15         | Blood_urea_level              | Blood parameters       | Health Traits          |
| 64781         | 15         | Thoracolumbar vertebra number | Conformation           | Exterior traits        |
| 30994         | 15         | Maternal infanticide          | Behavioral             | Exterior traits        |
| 64663         | 15         | Lumbar vertebra number        | Conformation           | Exterior traits        |
